# Supplementary material for: Thermogenic Activation Downregulates High Mitophagy Rate in Human Masked and Mature Beige Adipocytes
Source: MDPI journal article supplement (doi:10.3390/ijms21186640), 2020-09-10
Supplement: s1 [file s1]

Original western blots for Figure 1 B

Primary

SGBS

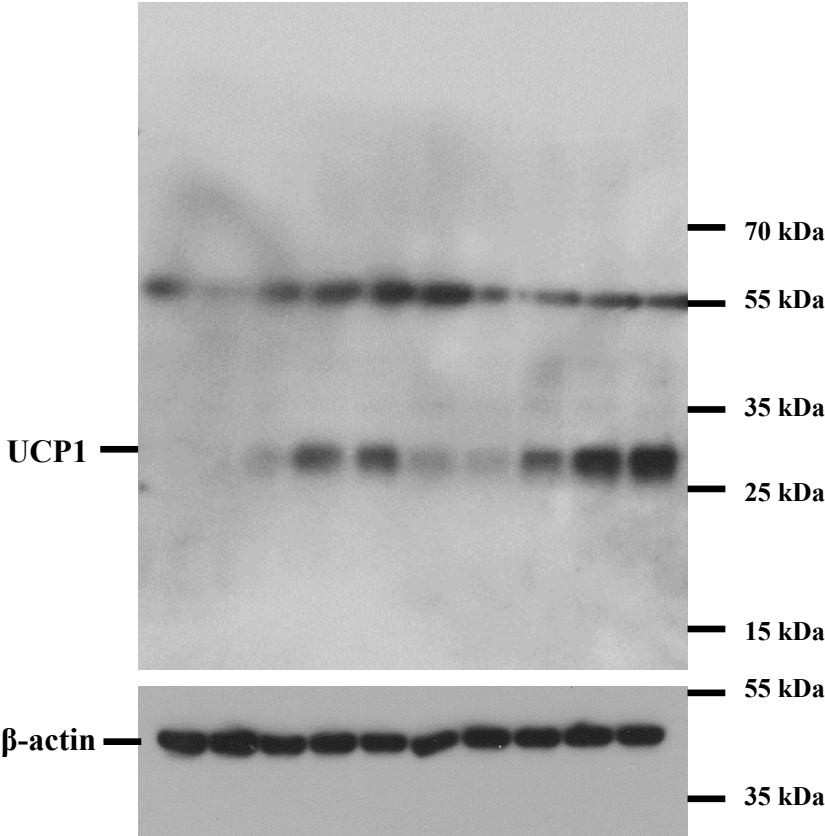

|          | WHITE |   |   |    |    | BEIGE |   |   |    |    |
|----------|-------|---|---|----|----|-------|---|---|----|----|
| CQ       | -     | + | - | -  | -  | -     | + | - | -  | -  |
| cAMP (h) | -     | - | 6 | 10 | 14 | -     | - | 6 | 10 | 14 |

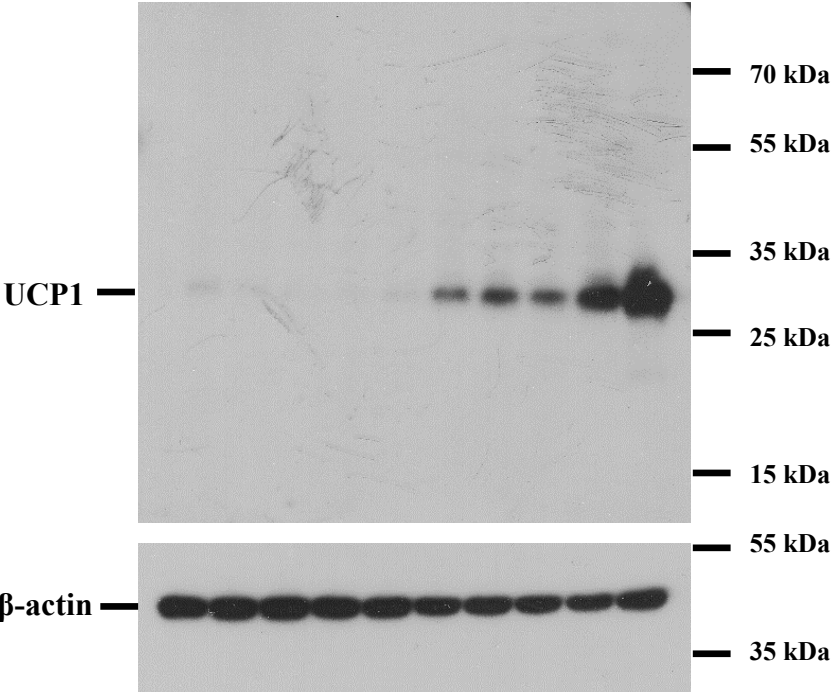

|          | WHITE |   |   |    |    | BEIGE |   |   |    |    |
|----------|-------|---|---|----|----|-------|---|---|----|----|
| CQ       | -     | + | - | -  | -  | -     | + | - | -  | -  |
| cAMP (h) | -     | - | 6 | 10 | 14 | -     | - | 6 | 10 | 14 |

# Original western blots for Figure 2 C

Primary

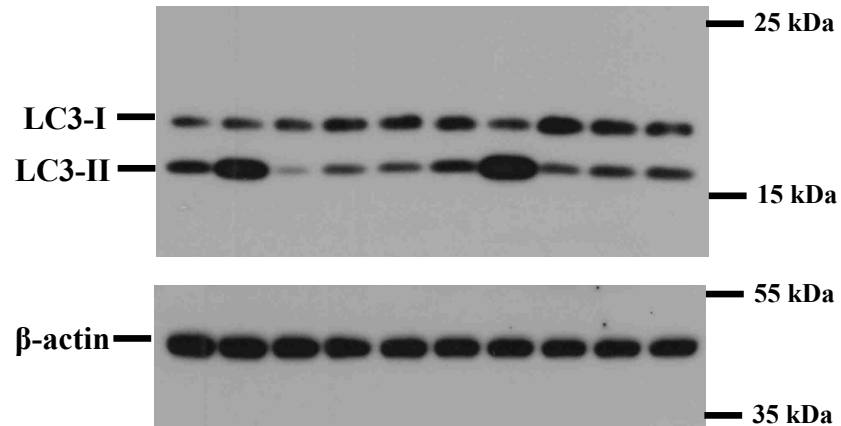

|          | WHITE |   |   |    |    | BEIGE |   |   |    |    |
|----------|-------|---|---|----|----|-------|---|---|----|----|
| CQ       | -     | + | - | -  | -  | -     | + | - | -  | -  |
| cAMP (h) | -     | - | 6 | 10 | 14 | -     | - | 6 | 10 | 14 |

Primary

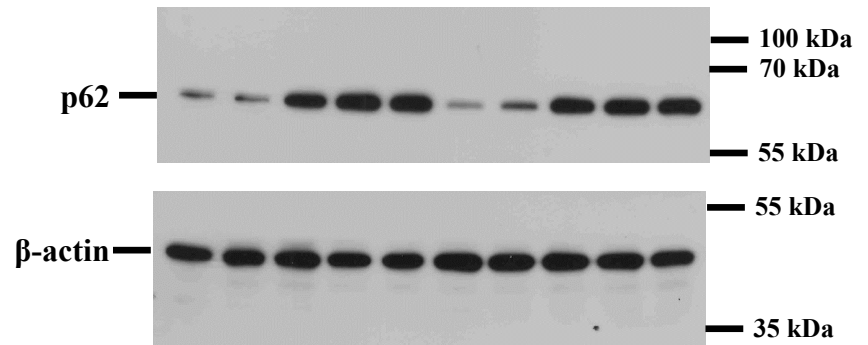

|          | WHITE |   |   |    |    | BEIGE |   |   |    |    |
|----------|-------|---|---|----|----|-------|---|---|----|----|
| CQ       | -     | + | - | -  | -  | -     | + | - | -  | -  |
| cAMP (h) | -     | - | 6 | 10 | 14 | -     | - | 6 | 10 | 14 |



Original western blots for Figure 2 D

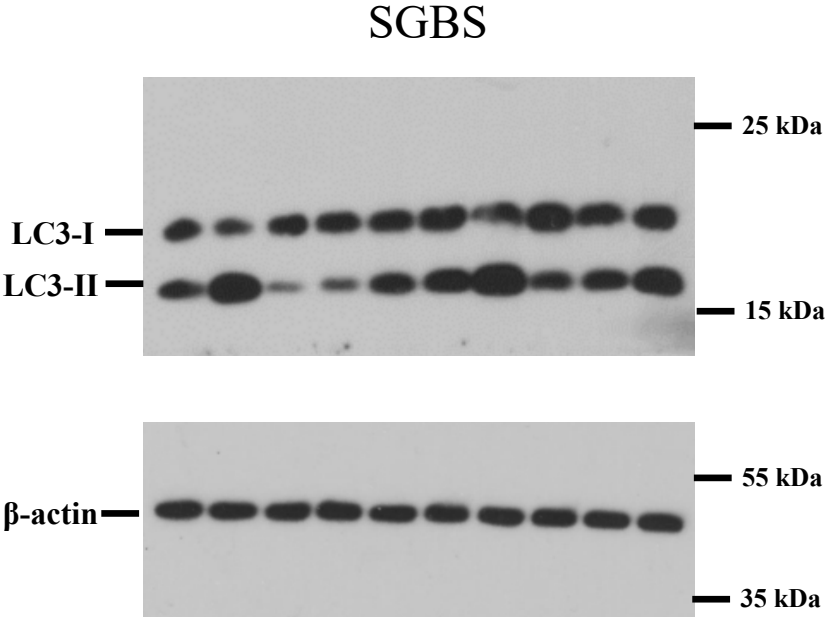

|          | WHITE |   |   |    |    | BEIGE |   |   |    |    |
|----------|-------|---|---|----|----|-------|---|---|----|----|
| CQ       | -     | + | - | -  | -  | -     | + | - | -  | -  |
| cAMP (h) | -     | - | 6 | 10 | 14 | -     | - | 6 | 10 | 14 |

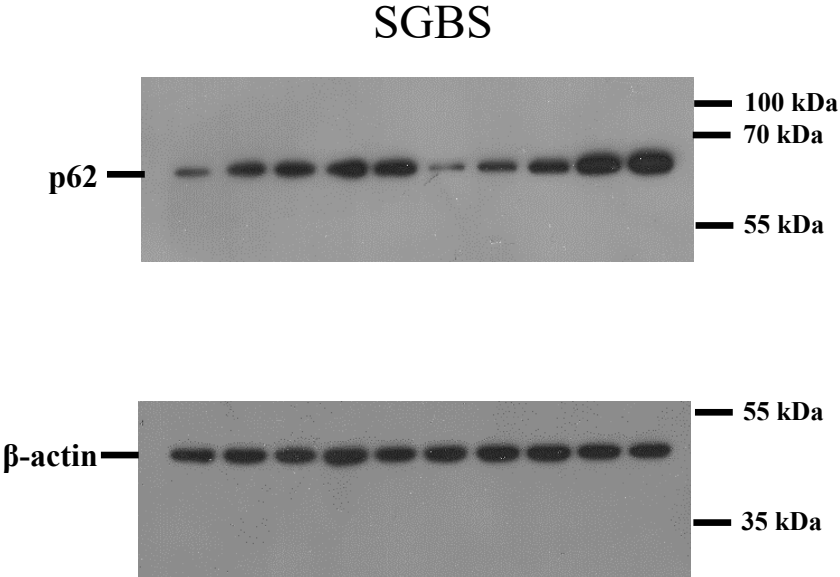

|          | WHITE |   |   |    |    | BEIGE |   |   |    |    |
|----------|-------|---|---|----|----|-------|---|---|----|----|
| CQ       | -     | + | - | -  | -  | -     | + | - | -  | -  |
| cAMP (h) | -     | - | 6 | 10 | 14 | -     | - | 6 | 10 | 14 |

# Original western blots for Figure 4 A

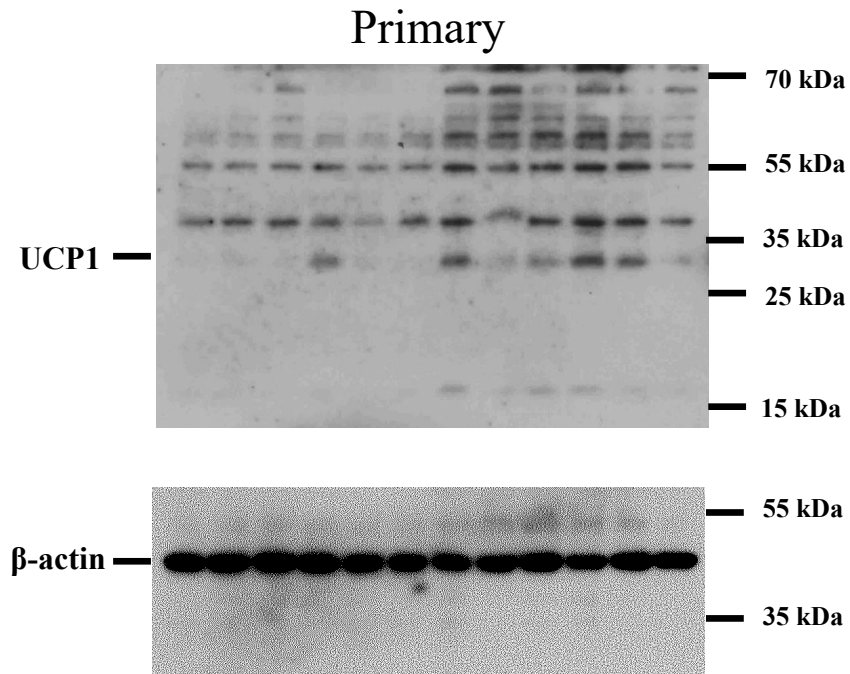

|      | WHITE |   |   |   |   |   | BEIGE |   |   |   |   |   |
|------|-------|---|---|---|---|---|-------|---|---|---|---|---|
| CQ   | -     | + | - | - | + | - | -     | + | - | - | + | - |
| H89  | -     | - | + | - | - | + | -     | - | + | - | - | + |
| cAMP | -     | - | - | + | + | + | -     | - | - | + | + | + |

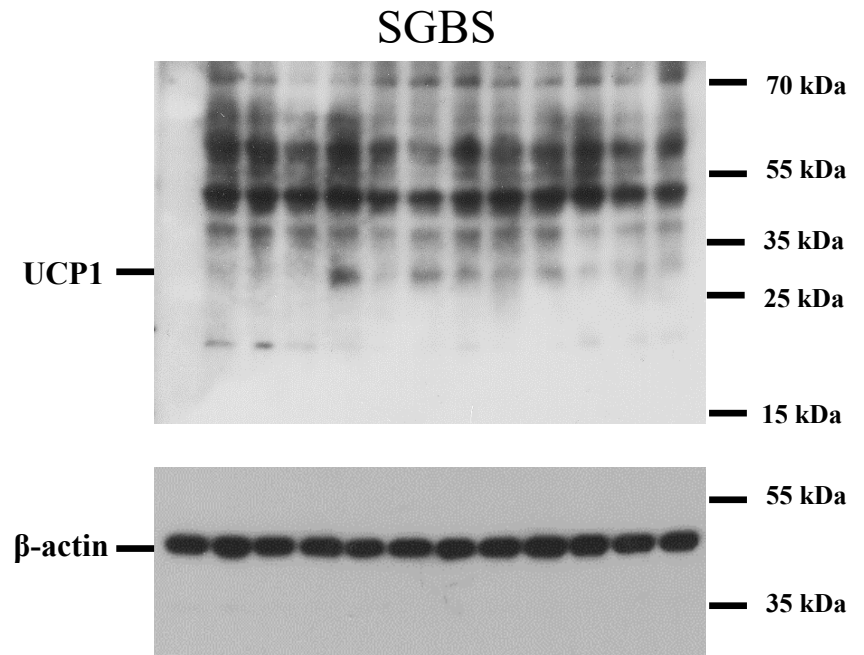

|      | WHITE |   |   |   |   |   | BEIGE |   |   |   |   |   |
|------|-------|---|---|---|---|---|-------|---|---|---|---|---|
| CQ   | -     | + | - | - | + | - | -     | + | - | - | + | - |
| H89  | -     | - | + | - | - | + | -     | - | + | - | - | + |
| cAMP | -     | - | - | + | + | + | -     | - | - | + | + | + |

# Original western blots for Figure 4 B

Primary

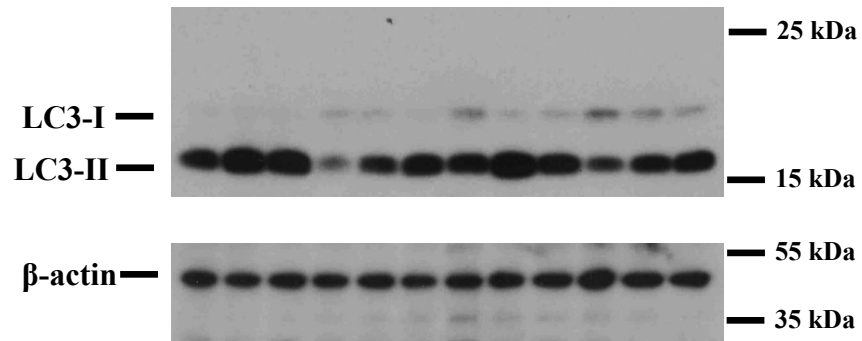

|      | WHITE |   |   |   |   |   | BEIGE |   |   |   |   |   |
|------|-------|---|---|---|---|---|-------|---|---|---|---|---|
| CQ   | -     | + | - | - | + | - | -     | + | - | - | + | - |
| H89  | -     | - | + | - | - | + | -     | - | + | - | - | + |
| cAMP | -     | - | - | + | + | + | -     | - | - | + | + | + |

SGBS

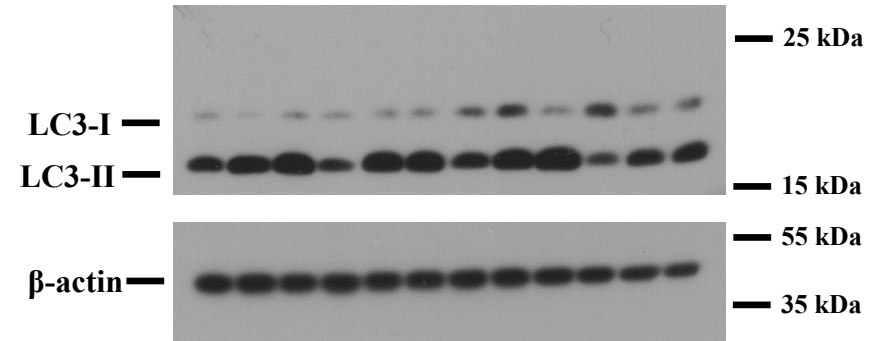

|      | WHITE |   |   |   |   |   | BEIGE |   |   |   |   |   |
|------|-------|---|---|---|---|---|-------|---|---|---|---|---|
| CQ   | -     | + | - | - | + | - | -     | + | - | - | + | - |
| H89  | -     | - | + | - | - | + | -     | - | + | - | - | + |
| cAMP | -     | - | - | + | + | + | -     | - | - | + | + | + |

Original western blots for Figure 4 C

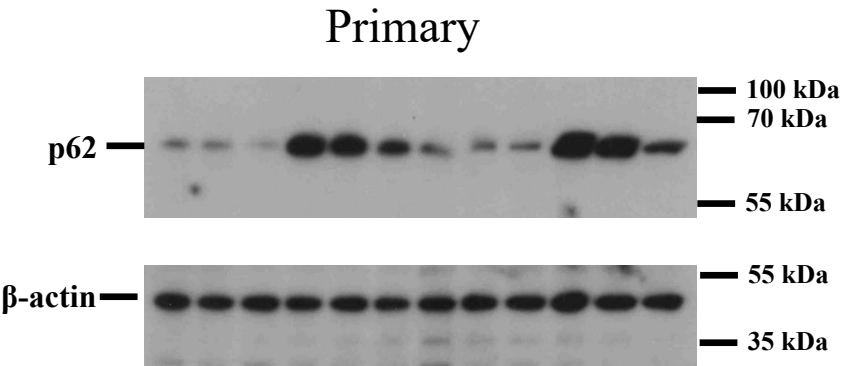

|      | WHITE |   |   |   |   |   | BEIGE |   |   |   |   |   |
|------|-------|---|---|---|---|---|-------|---|---|---|---|---|
| CQ   | -     | + | - | - | + | - | -     | + | - | - | + | - |
| H89  | -     | - | + | - | - | + | -     | - | + | - | - | + |
| cAMP | -     | - | - | + | + | + | -     | - | - | + | + | + |

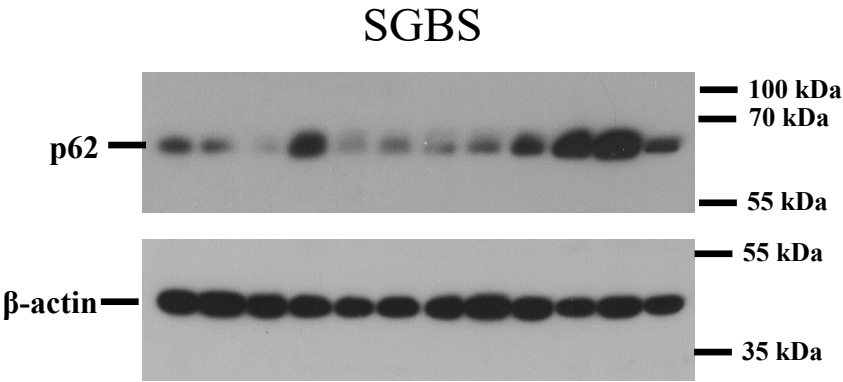

|      | WHITE |   |   |   |   |   | BEIGE |   |   |   |   |   |
|------|-------|---|---|---|---|---|-------|---|---|---|---|---|
| CQ   | -     | + | - | - | + | - | -     | + | - | - | + | - |
| H89  | -     | - | + | - | - | + | -     | - | + | - | - | + |
| cAMP | -     | - | - | + | + | + | -     | - | - | + | + | + |

Original western blots for Figure 5 B

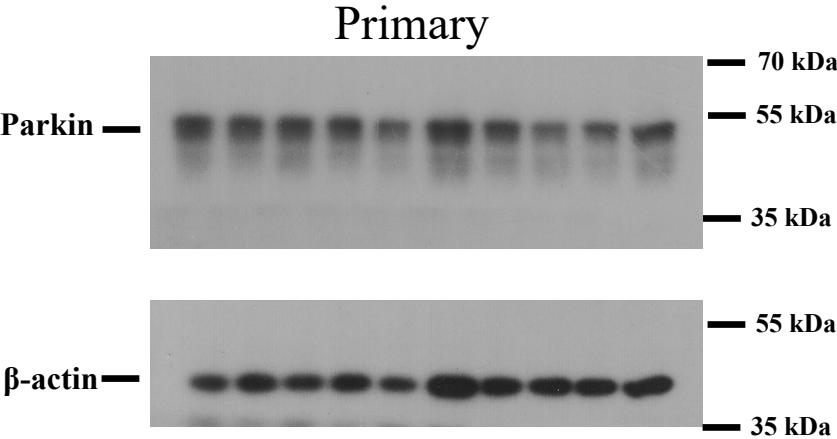

|          | WHITE |   |   |    |    | BEIGE |   |   |    |    |
|----------|-------|---|---|----|----|-------|---|---|----|----|
| CQ       | -     | + | - | -  | -  | -     | + | - | -  | -  |
| cAMP (h) | -     | - | 6 | 10 | 14 | -     | - | 6 | 10 | 14 |

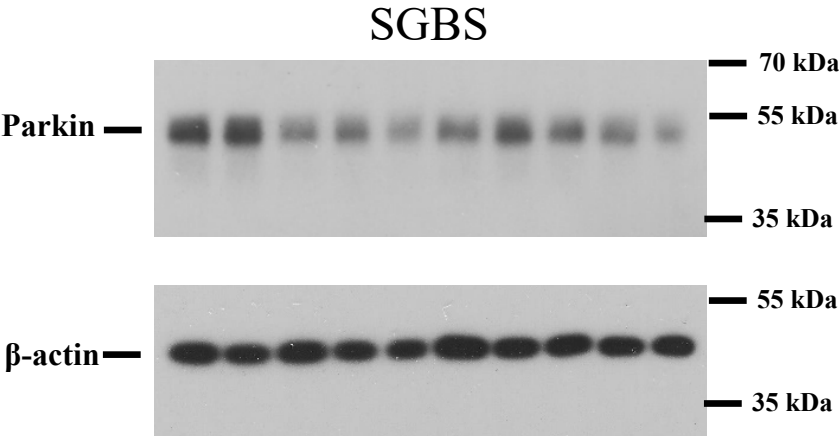

|          | WHITE |   |   |    |    | BEIGE |   |   |    |    |
|----------|-------|---|---|----|----|-------|---|---|----|----|
| CQ       | -     | + | - | -  | -  | -     | + | - | -  | -  |
| cAMP (h) | -     | - | 6 | 10 | 14 | -     | - | 6 | 10 | 14 |

# Original western blots for Figure 6

Primary

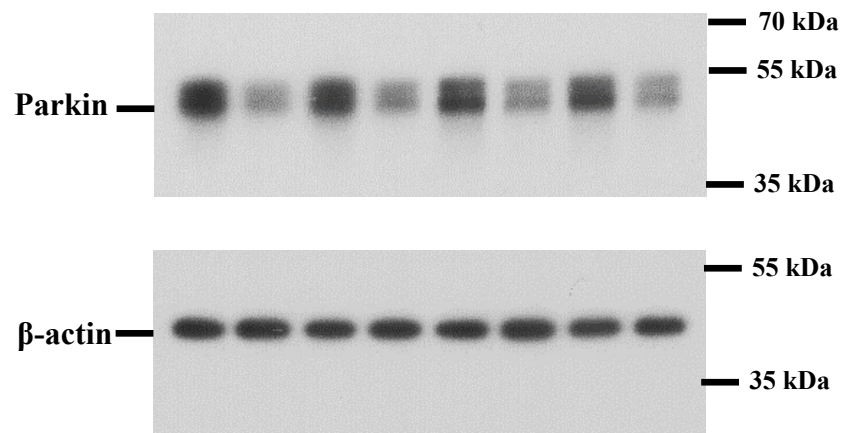

|         | WHITE |   |   |   | BEIGE |   |   |   |
|---------|-------|---|---|---|-------|---|---|---|
| siCTRL  | +     | - | + | - | +     | - | + | - |
| siPARK2 | -     | + | - | + | -     | + | - | + |
| cAMP    | -     | - | + | + | -     | - | + | + |

Primary

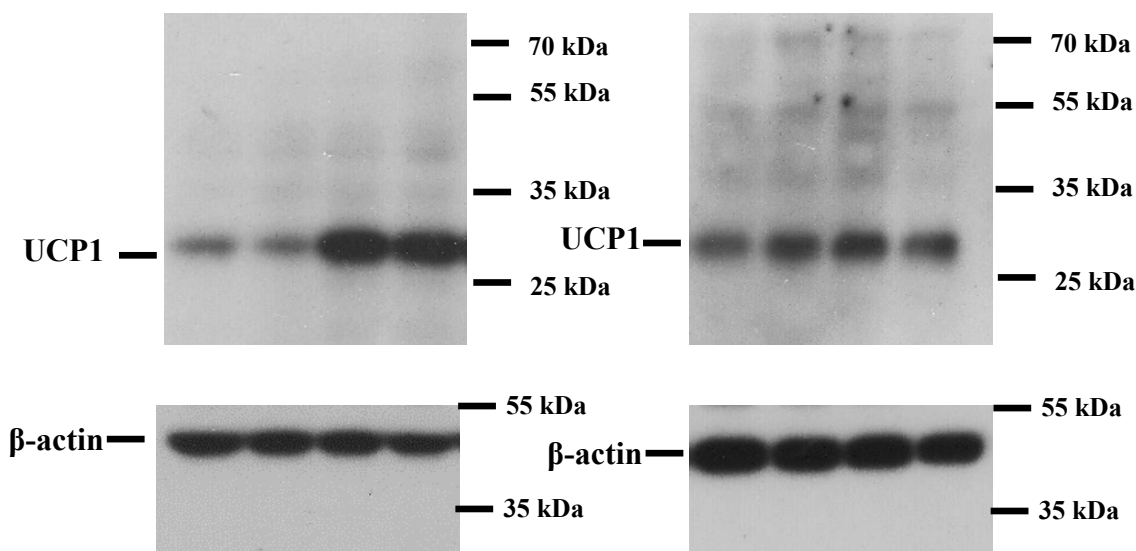

|         | WHITE |   |   |   |
|---------|-------|---|---|---|
| siCTRL  | +     | - | + | - |
| siPARK2 | -     | + | - | + |
| cAMP    | -     | - | + | + |

|         | BEIGE |   |   |   |
|---------|-------|---|---|---|
| siCTRL  | +     | - | + | - |
| siPARK2 | -     | + | - | + |
| cAMP    | -     | - | + | + |

# Original western blots for Figure 6

Primary

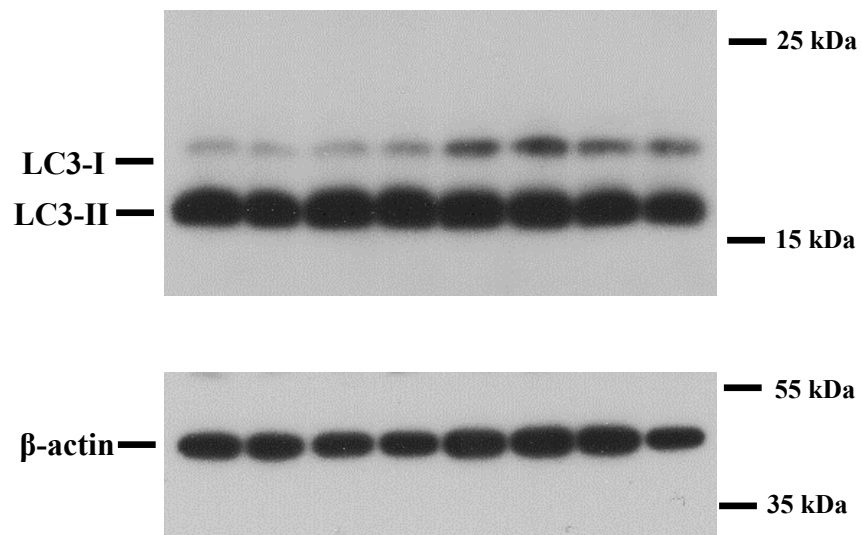

|         | WHITE |   |   |   | BEIGE |   |   |   |
|---------|-------|---|---|---|-------|---|---|---|
| siCTRL  | +     | - | + | - | +     | - | + | - |
| siPARK2 | -     | + | - | + | -     | + | - | + |
| cAMP    | -     | - | + | + | -     | - | + | + |

Primary

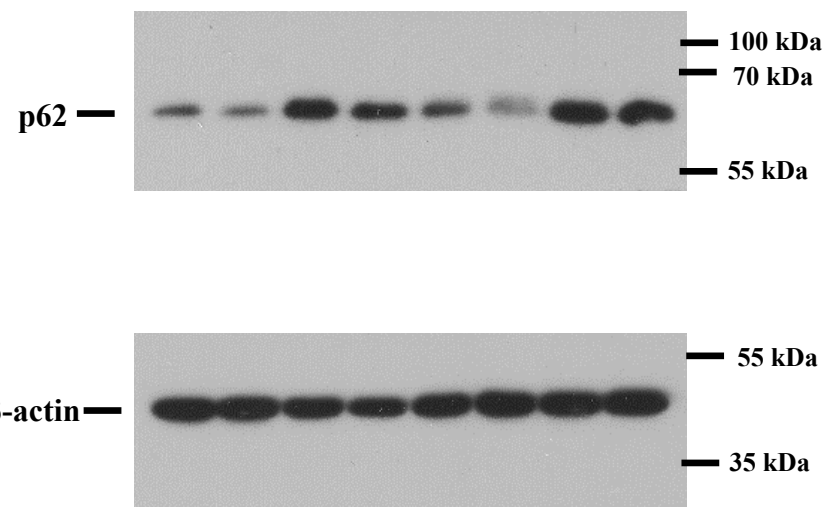

|         | WHITE |   |   |   | BEIGE |   |   |   |
|---------|-------|---|---|---|-------|---|---|---|
| siCTRL  | +     | - | + | - | +     | - | + | - |
| siPARK2 | -     | + | - | + | -     | + | - | + |
| cAMP    | -     | - | + | + | -     | - | + | + |



## Original western blots for Figure 6

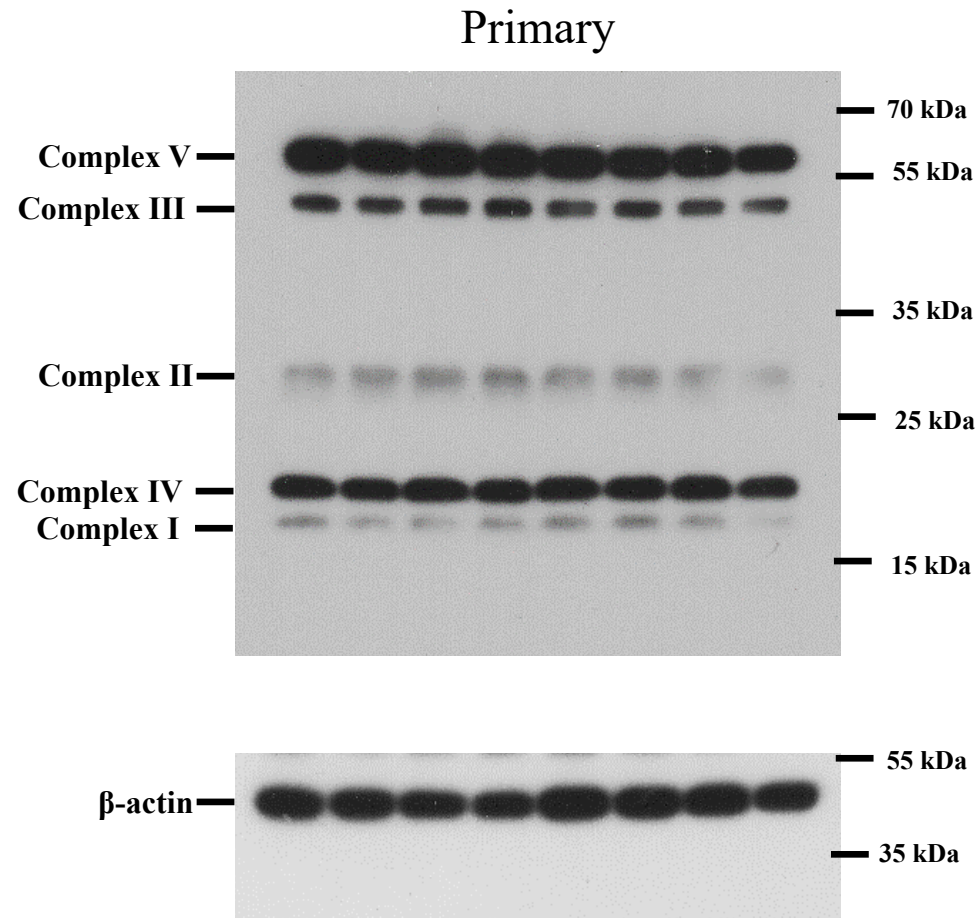

|         | WHITE |   |   |   | BEIGE |   |   |   |
|---------|-------|---|---|---|-------|---|---|---|
| siCTRL  | +     | - | + | - | +     | - | + | - |
| siPARK2 | -     | + | - | + | -     | + | - | + |
| cAMP    | -     | - | + | + | -     | - | + | + |
