# Supplementary material for: Thermogenic Activation Downregulates High Mitophagy Rate in Human Masked and Mature Beige Adipocytes
Source: Int J Mol Sci. 2020 Sep 10;21(18):6640. doi: 10.3390/ijms21186640 (PMC7555361; doi:10.3390/ijms21186640)
Supplement: Supplementary file 1 [file ijms-21-06640-s001.zip]

Archive with 4 entries (4 files):
- Supplementary materials.pdf
- __MACOSX/._Supplementary materials.pdf
- All original western blots.pdf
- __MACOSX/._All original western blots.pdf
